# Supplementary material for: Gold nanoparticle etching induced by an enzymatic-like reaction for the colorimetric detection of hydrogen peroxide and glucose
Source: Royal Society of Chemistry journal article supplement (doi:10.1039/c9ay01599j), 2019-01-01
Supplement: c9ay01599j1.pdf [file c9ay01599j1.pdf]

## **Gold nanoparticle etching induced by an enzymatic-like reaction for the colorimetric detection of hydrogen peroxide and glucose**

Manman Lu<sup>a,b</sup>, Linjing Su<sup>\*b,c</sup>, Yanghe Luo<sup>a,b</sup>, Xionghui Ma<sup>\*d,e</sup>, Zhenhua Duan<sup>b,c</sup>, Dongjian  
Zhu<sup>b,c</sup> and Yuhao Xiong<sup>\*b,c</sup>

<sup>a</sup> College of Food Science and Technology, Dalian Polytechnic University, Dalian, 116034, P. R. China

<sup>b</sup> College of Food and Bioengineering, Hezhou University, Hezhou, 542899, P. R. China

<sup>c</sup> Institute of Food science and Engineering Technology, Hezhou University, Hezhou, 542899, P. R. China

<sup>d</sup> Analysis and Test Center of Chinese Academy of Tropical Agricultural Sciences, Haikou, 571101, P. R. China;

<sup>e</sup> Laboratory of Quality & Safety Risk Assessment for Tropical Products (Haikou) Ministry of Agriculture, Haikou, 571101, P. R. China

\* Corresponding author:

Tel.: +86-774-5229756

Fax.: +86-774-5228605

E. mail : xiongyuhao@yeah.net

maxionghui@foxmail.com

linjingsu@163.com

### **Preparation of mixed-valence MoO<sub>3</sub> nanosheets**

Mixed-valence MoO<sub>3</sub> nanosheets were prepared by liquid exfoliation assisted by sonication followed by photochemical reduction<sup>1</sup>. Briefly, 3.0 g of commercial MoO<sub>3</sub> powder was dispersed in 200 mL of an ethanol/water mixed solution (50:50 vol.%) and then sonicated for 180 min at a power of 380 W. Then, the transparent supernatant containing a high concentration MoO<sub>3</sub> nanosheets was obtained by filtration through a 0.25 μm nylon membrane filter. Next, a certain volume of the MoO<sub>3</sub> nanosheet solution was irradiated with a 19 W UV lamp for 20 min. The obtained solution, which was blue in colour, contained mixed-valence MoO<sub>3</sub> nanosheets.

### **Preparation of AuNPs using mixed-valence MoO<sub>3</sub> nanosheets**

First, 10 mL of mixed-valence MoO<sub>3</sub> nanosheet solution and 5 mL of HAuCl<sub>4</sub> (0.2 wt.%) were mixed well. Then, this solution was allowed to stand for 20 min to trigger gold nucleation via the reduction of the MoO<sub>3</sub> nanosheets. The reaction was kept for another 12 h in a refrigerator at 4 °C to promote complete conversion for the formation of AuNPs. The final AuNP solution, which was burgundy in colour, was stored in a refrigerator at 4 °C without any washing or purification.

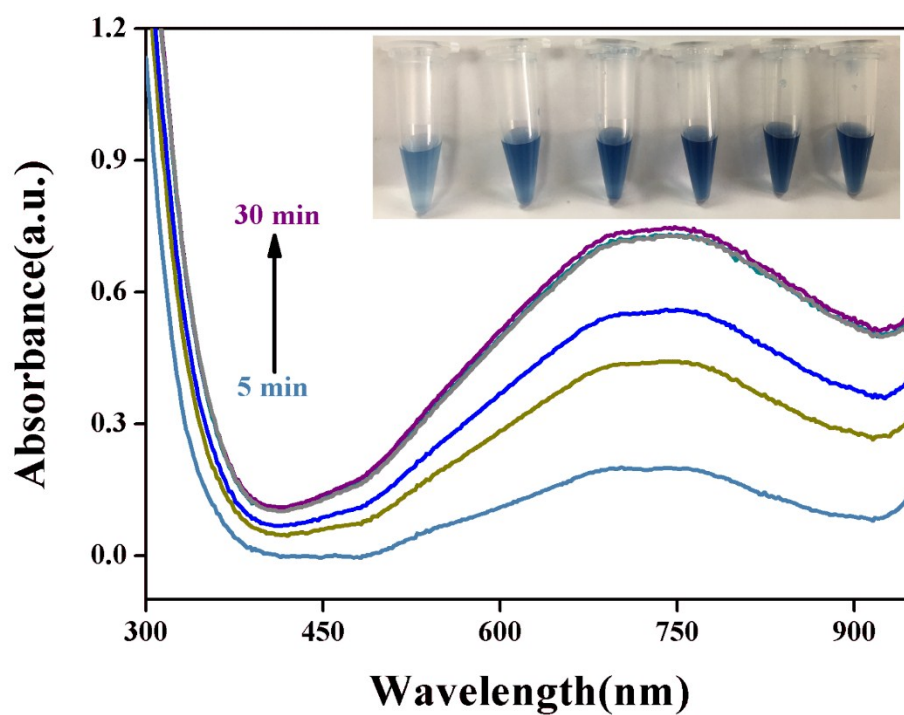

Fig. S1 UV-vis absorbance spectra of the MoO<sub>3</sub> nanosheets samples with different UV irradiation time. The inset shows the corresponding photograph.

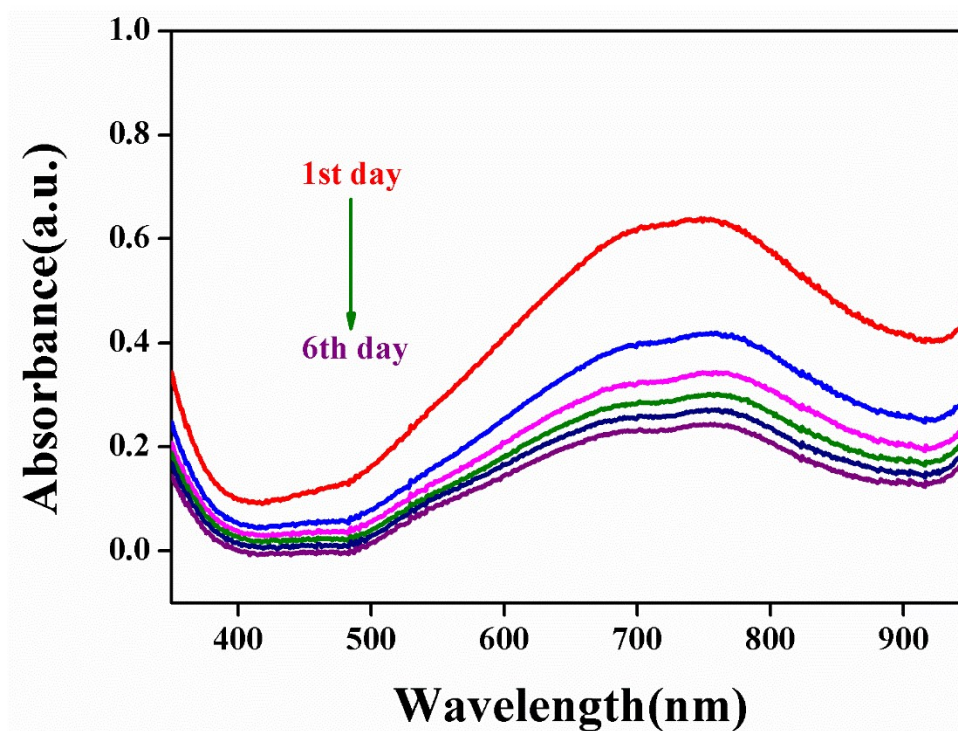

Fig. S2 UV-vis absorbance spectra of blue color mixed valence state MoO<sub>3</sub> nanosheets with different preservation time.

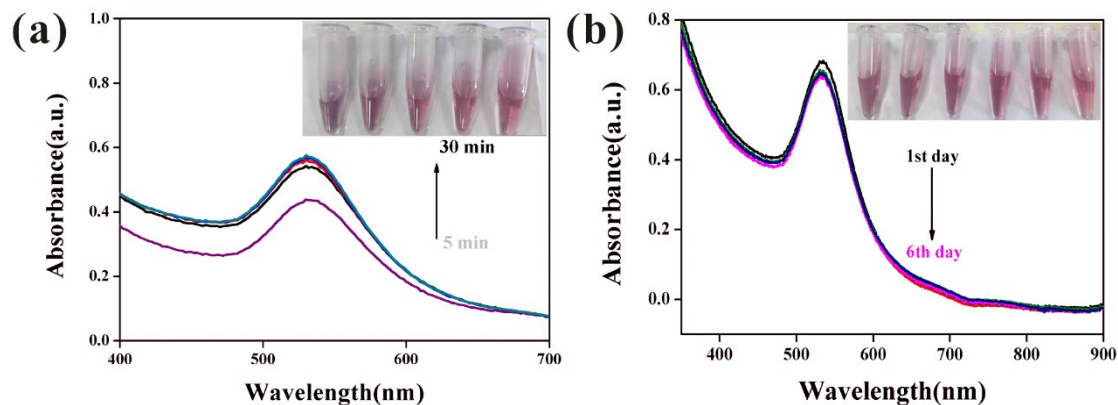

**Fig. S3** (a) UV-vis absorbance spectra of HAuCl<sub>4</sub>/ mixed valence state MoO<sub>3</sub> nanosheets solution at different time, (b) UV-vis absorbance spectra of obtained AuNPs solution with different preservation time. The inset shows the corresponding photographs.

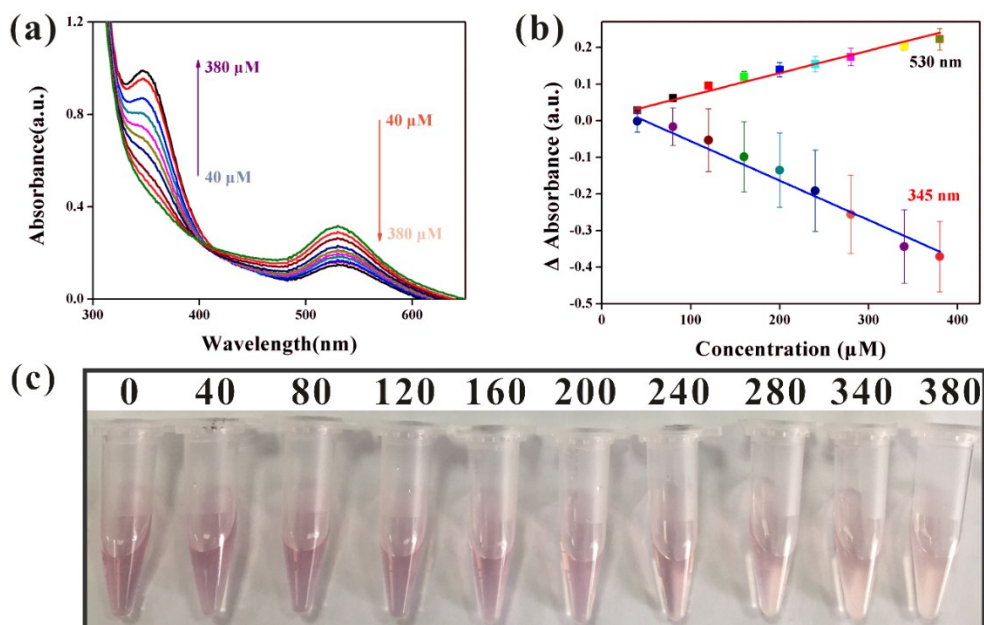

**Fig. S4** (a) UV-vis absorption spectra, (b) linear calibration plots for H<sub>2</sub>O<sub>2</sub> detection (the vertical coordinates  $\Delta A = A_0 - A$ , where  $A_0$  and  $A$  are the absorbance intensities in the absence and presence of H<sub>2</sub>O<sub>2</sub>, respectively.) and (c) corresponding color change photograph.

Table S1 Comparative analysis of various colorimetric sensors employed for glucose detection

| Materials used                          | Signal probe        | One-pot of detection | Linear range ( $\mu\text{M}$ ) | Detection limit ( $\mu\text{M}$ ) | References |
|-----------------------------------------|---------------------|----------------------|--------------------------------|-----------------------------------|------------|
| $\text{Fe}_3\text{O}_4\text{-Au@SiO}_2$ | TMB                 | No                   | 10-130                         | 0.5                               | [2]        |
| $\text{FeWO}_4$                         | TMB                 | No                   | 4-60                           | 0.67                              | [3]        |
| Fe-MIL-88NH <sub>2</sub>                | TMB                 | No                   | 2-300                          | 0.48                              | [4]        |
| Au@Ag                                   | C-dots              | No                   | 0.5-300                        | 0.2                               | [5]        |
| Gold nanorods                           | Gold nanorods       | Yes                  | 0.1-1,1-10                     | 0.1                               | [6]        |
| Gold nanobipyramids                     | Gold nanobipyramids | Yes                  | 0.05-90                        | 0.02                              | [7]        |
| Silver Nanoprism                        | Silver Nanoprism    | Yes                  | 0.2-100                        | 0.2                               | [8]        |
| AuNPs                                   | AuNPs               | Yes                  | 1-10                           | 0.45                              | This work  |

Table S2 Recovery experiments of glucose detection

| Sample         | Initial amount (mM) | Added (mM) | Found ( $\mu\text{g}$ ) | Recovery (%) | RSD (n=5) (%) |
|----------------|---------------------|------------|-------------------------|--------------|---------------|
| Water chestnut | 0.1                 | 0.01       | 0.11                    | 100          | 1.6           |
|                |                     | 0.5        | 0.64                    | 108          | 2.0           |
|                |                     | 1.0        | 1.12                    | 102          | 2.3           |

## References:

1. L. Su, Y. Xiong, Z. Chen, Z. Duan, Y. Luo, D. Zhu and X. Ma, *Sen. Actuat. B-Chem.*, 2019, 279, 320-326.
2. X. He, L. Tan, D. Chen, X. Wu, X. Ren, Y. Zhang, X. Meng and F. Tang, *Chem. Commun.*, 2013, **49**, 4643-4645.
3. T. Tian, L. Ai, X. Liu, L. Li, J. Li and J. Jiang, *Ind. Eng. Chem. Res.*, 2015, **54**, 1171-1178.
4. Y.L. Liu, X.J. Zhao, X.X. Yang and Y.F. Li, *Analyst*, 2013, **138**, 4526-4531.
5. W. Liu, F. Ding, Y. Wang, L. Mao, R. Liang, P. Zou, X. Wang, Q. Zhao and H. Rao, *Sen. Actuat. B-Chem.*, 2018, **265**, 310-317.
6. Z. Zhang, Z. Chen, F. Cheng, Y. Zhang and L. Chen, *Biosens. Bioelectron.*, 2017, **89**, 932-936.
7. S. Xu, L. Jiang, Y. Liu, P. Liu, W. Wang and X. Luo, *Anal. Chim. Acta*, 2019, **1071**, 53-58.
8. Y. Xia, J. Ye, K. Tan, J. Wang and G. Yang, *Anal. Chem.*, 2013, **85**, 6241-6247.
